# Supplementary material for: Plasmacytoid dendritic cells sense HIV replication before detectable viremia following treatment interruption
Source: JCI journal article supplement (doi:10.1172/jci130597), 2020-02-04
Supplement: sd1 [file 1]

1 **Supplementary Materials**

2

3 **Supplemental Acknowledgements**

4 The study groups include: Nipat Teeratakulpisarn<sup>1</sup>, Supanit Pattanachaiwit<sup>1</sup>, James Fletcher<sup>1</sup>,  
5 Ponpen Tantivitayakul<sup>1</sup>, Duanghathai Suttichom<sup>1</sup>, Peeriya Prueksakaew<sup>1</sup>, Kultida Poltavee<sup>1</sup>,  
6 Jintana Intasan<sup>1</sup>, Tassanee Luekasemsuk<sup>1</sup>, Hathairat Savadsuk<sup>1</sup>, Somporn Tipsuk<sup>1</sup>, Nisakorn  
7 Ratnaratorn<sup>1</sup>, Kamonkan Tangnaree<sup>1</sup>, Chutharat Munkong<sup>1</sup>, Rommanus Thaimanee<sup>1</sup>, Patcharin  
8 Eamyong<sup>1</sup>, and Sasiwimol Ubolyam<sup>1</sup>, Robert O’Connell<sup>2</sup>, Alexandra Schuetz<sup>2</sup>, Denise Hsu<sup>2</sup>,  
9 Tanyaporn Wansom<sup>2</sup>, Siritwat Akapirat<sup>2</sup>, Bessara Nuntapinit<sup>2</sup>, Nantana Tantibul<sup>2</sup>, Nampueng  
10 Churikanont<sup>2</sup>, Saowanit Getchalarat<sup>2</sup>, Ellen Turk<sup>3,4</sup>, Corinne McCullough<sup>3,4</sup>, Oratai  
11 Butterworth<sup>3,4</sup>, Madelaine Ouelette<sup>3,4</sup>, Mark Milazzo<sup>3,4</sup>, and Leigh Anne Eller<sup>3,4</sup>

12

13 <sup>1</sup>SEARCH, The Thai Red Cross AIDS Research Centre, Bangkok 10330, Thailand.

14 <sup>2</sup> Department of Retrovirology, Armed Forces Research Institute of Medical Sciences United  
15 States Component, Bangkok 10400, Thailand.

16 <sup>3</sup>U.S. Military HIV Research Program, Walter Reed Army Institute of Research, Silver Spring,  
17 MD 20910, USA.

18 <sup>4</sup>Henry M. Jackson Foundation for the Advancement of Military Medicine, Bethesda, MD  
19 20817, USA.

20

21

22

23

24 **Supplemental Figures**

25 Supplemental Figure 1. ATI study design.

26 Supplemental Figure 2. Comparison of pDC frequency with pDC absolute count and between  
27 treatment arms.

28 Supplemental Figure 3. Changes in mDC and monocyte frequencies after ATI.

29 Supplemental Figure 4. Comparison of surface marker expression between arms of RV397.

30 Supplemental Figure 5. Cytokine production by pDCs after in vitro activation.

31 Supplemental Figure 6. Changes in non-functional pDC phenotypes after ATI.

32 Supplemental Figure 7. Changes in signaling and gene expression in mDCs after ATI.

33 Supplemental Table 1. TaqMan Assay IDs

34

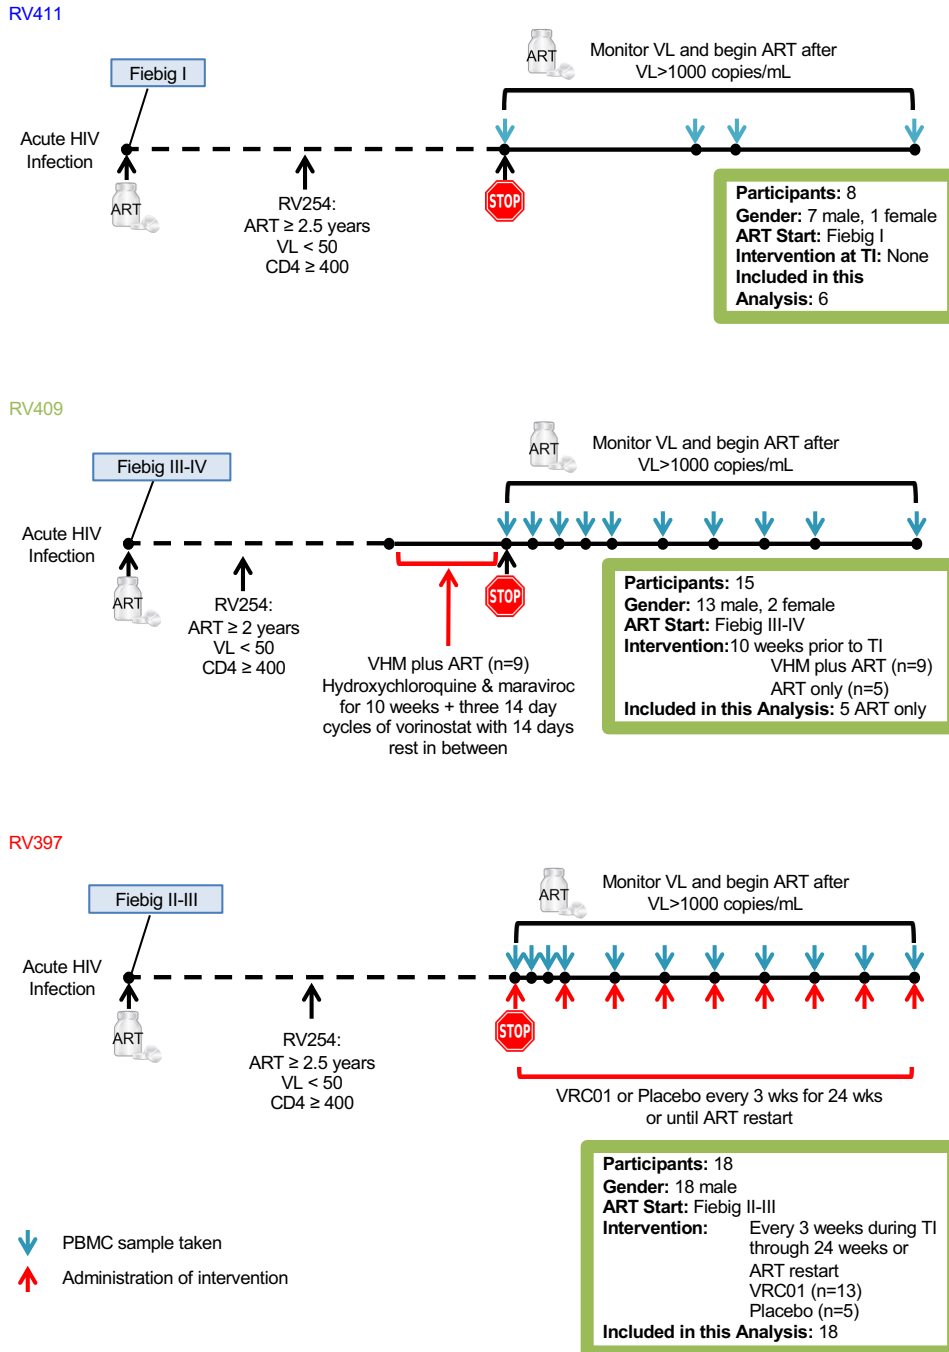

35  
 36 **Supplemental Figure 1. ATI study design.** Participants were enrolled in one of three ATI  
 37 studies which occurred in Thailand. RV411 included 8 participants who were treated in Fiebig  
 38 stage I of AHI and received no intervention at the time of ATI. RV409 included 15 participants  
 39 who started ART in Fiebig stages III-IV, only 14 of whom interrupted ART. Nine participants in  
 40 RV409 received vorinostat, hydroxychloroquine, and maraviroc in addition to ART for ten  
 41 weeks prior to ATI. RV397 included 18 participants who started ART during Fiebig stages II-III  
 42 of acute infection. Thirteen participants in this study received infusions of the VRC01 antibody  
 43 at three-week intervals after ATI.

44

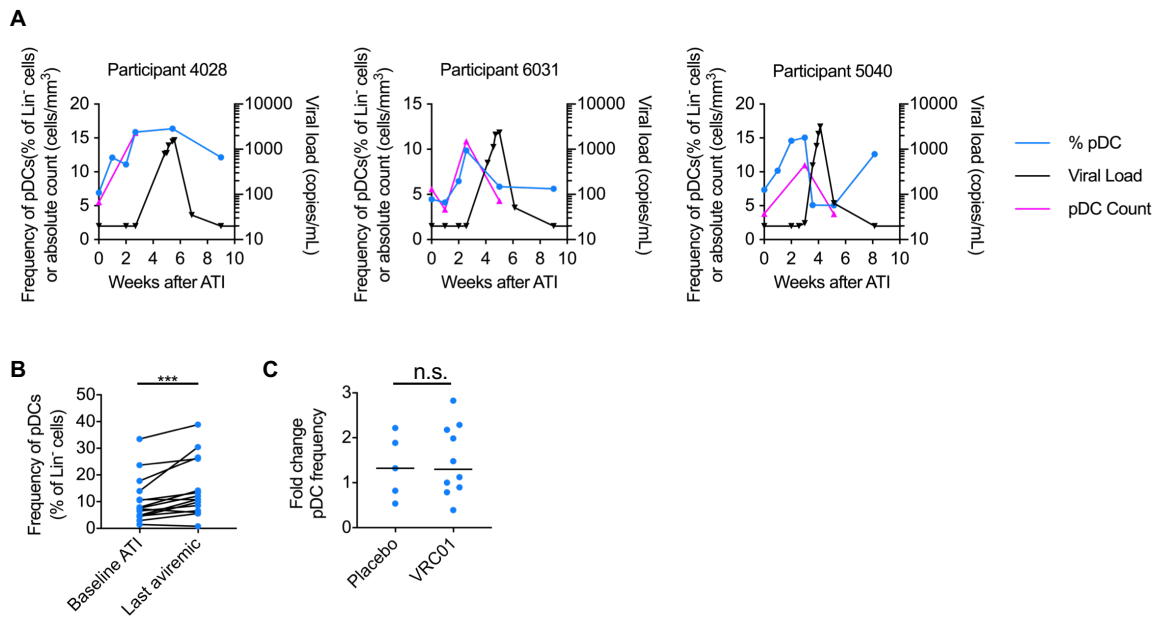

45

46 **Supplemental Figure 2. Comparison of pDC frequency with pDC absolute count and**

47 **between treatment arms. (A)** pDC absolute count was determined in RV397 participants at time

48 points when the absolute CD4<sup>+</sup> T cells count was measured at the time of sampling. Absolute

49 pDC count was calculated using the number of pDCs measured by flow cytometry and the ratio

50 of the absolute CD4<sup>+</sup> T cell count to the number of CD4<sup>+</sup> T cells measured by flow cytometry.

51 Shown are the pDC frequency (blue) and absolute pDC count (pink) for three participants for

52 whom pDC counts could be calculated prior to detection of plasma viremia. (B) The frequency of

53 pDCs was compared between the baseline time point at treatment interruption and the last

54 aviremic point after ATI in participants who received no therapeutic intervention. n = 15 (\*\*\*)

55  $p < 0.001$ , Wilcoxon test). (C) The median fold change in pDC frequency between baseline ATI

56 and the last aviremic time point was compared between participants in the placebo and treatment

57 arms of RV397. Data were analyzed with the Mann-Whitney test. n = 5 placebo, 10 treatment.

58

59

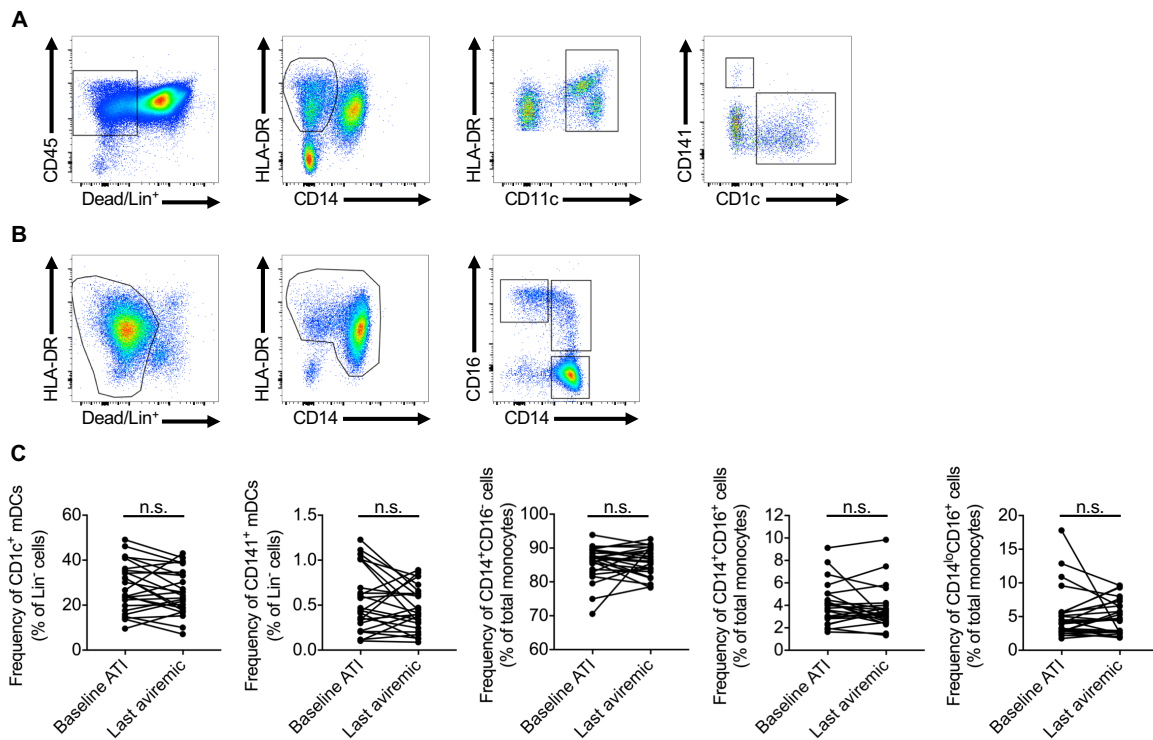

60

61 **Supplemental Figure 3. Changes in mDC and monocyte frequencies after ATI.**

62 (A) CD1c<sup>+</sup> and CD141<sup>+</sup> mDCs in the blood were identified within the CD45<sup>+</sup>HLA-DR<sup>+</sup>CD11c<sup>+</sup>

63 lineage negative cells (CD3<sup>-</sup>CD14<sup>-</sup>CD19<sup>-</sup>CD56<sup>-</sup>) by flow cytometry. (B) Classical

64 (CD14<sup>+</sup>CD16<sup>-</sup>), intermediate (CD14<sup>+</sup>CD16<sup>+</sup>), and nonclassical (CD14<sup>-</sup>CD16<sup>+</sup>) monocytes were

65 identified within the lineage negative (CD3<sup>-</sup>CD19<sup>-</sup>CD56<sup>-</sup>) HLA-DR<sup>+</sup> population. (C) The

66 frequencies of dendritic cell and monocyte populations at baseline ATI and the last aviremic time

67 point are shown. Dendritic cell frequencies were measured as a percentage of the HLA-DR<sup>+</sup>

68 lineage negative cells. n = 25, 10 of whom received VRC01.

69

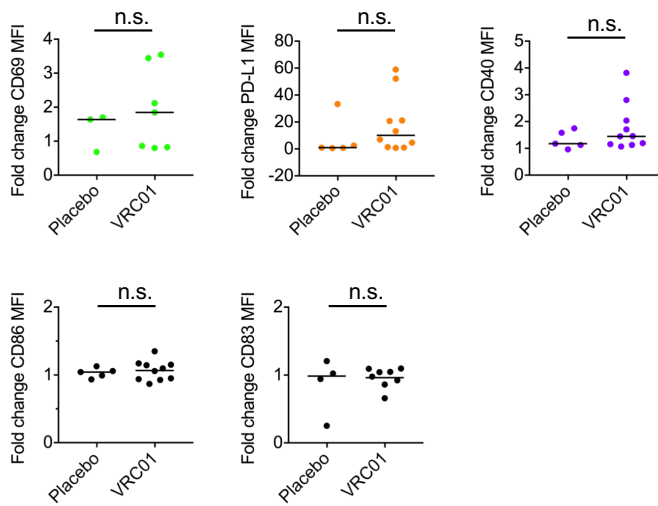

70

71 **Supplemental Figure 4. Comparison of surface marker expression between arms of RV397.**

72 The median fold change in MFI of CD69, PD-L1, CD40, CD86, and CD83 between baseline

73 ATI and the last aviremic time point was compared between participants in the placebo and

74 treatment arms of RV397. Data were analyzed with the Mann-Whitney test. n = 5 placebo, 10

75 treatment.

76

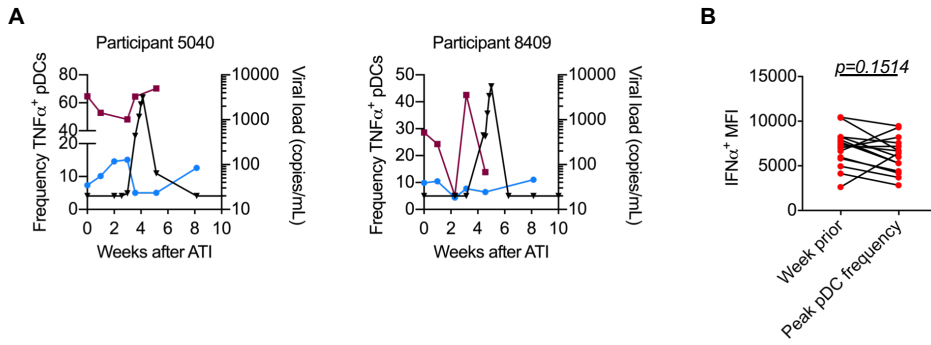

77

78 **Supplemental Figure 5. Cytokine production by pDCs after in vitro activation.**

79 (A) The percentages of pDCs that produced TNF $\alpha$  in response to imiquimod stimulation

80 (maroon) are shown. pDC frequency (blue) and HIV-1 viral load (black) are included for

81 reference. (B) The mean fluorescence intensity of IFN $\alpha$  in pDCs after imiquimod stimulation is

82 compared between the time point before viremia at which the highest pDC frequency occurred

83 and the time point immediately prior. p-value was calculated with the Wilcoxon test. n = 14

84 participants from RV397, 11 of whom received VRC01.

85

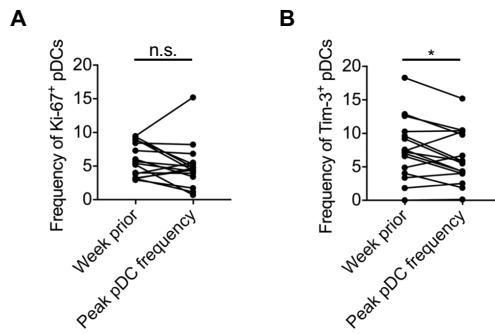

86

87 **Supplemental Figure 6. Changes in non-functional pDC phenotypes after ATI.**

88 (A) The percentage of pDCs positive for Ki-67 was measured by flow cytometry and compared  
 89 between the visit with peak pDC frequency and the visit immediately prior. (B) The frequency of  
 90 pDCs expressing Tim-3 was measured by flow cytometry and compared between the week of  
 91 peak pDC frequency prior to detectable viremia and the week prior (\*  $p < 0.05$ , Wilcoxon test).

92



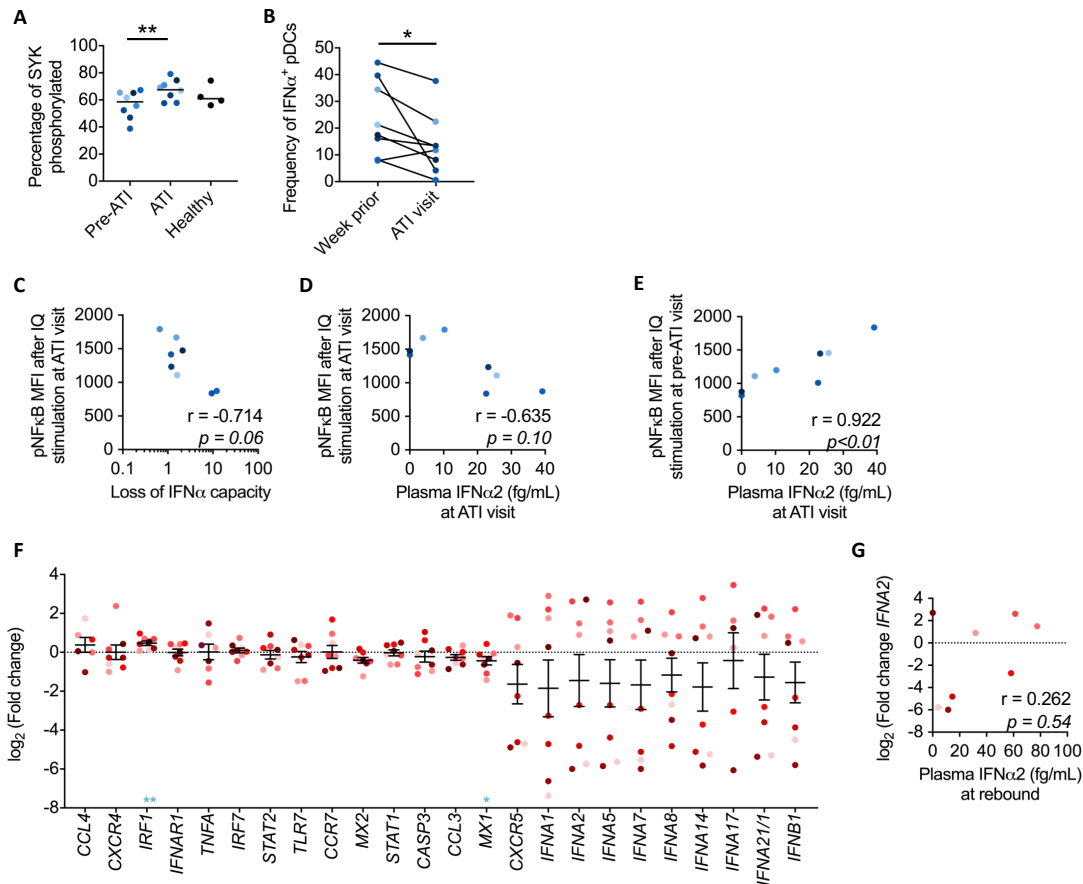

93  
 94 **Supplemental Figure 7. Changes in signaling gene expression in mDCs after ATI.**  
 95 (A) The basal percentage of SYK that was phosphorylated was measured by flow cytometry  
 96 immediately after thawing PBMCs from a visit prior to ATI (pre-ATI), after ATI (ATI), and  
 97 from HIV<sup>-</sup> healthy Thai individuals (bar represents median percentage, \*\*  $p < 0.01$ , Wilcoxon  
 98 test). (B) The frequencies of pDCs producing IFN $\alpha$  after imiquimod stimulation are shown for  
 99 the ATI visit when phosphorylation of IRF7 and NF- $\kappa$ B was measured and the week prior (\*  
 100  $p < 0.05$ , Wilcoxon test). Loss of IFN $\alpha$  capacity was calculated as the frequency of pDCs  
 101 producing IFN $\alpha$  at the “Week Prior” visit divided by the ATI visit. (C) The phosphorylation  
 102 levels of NF- $\kappa$ B were measured in pDCs by flow cytometry after in vitro imiquimod stimulation  
 103 of PBMCs. Spearman correlations were performed between the MFI of NF- $\kappa$ B and the loss in  
 104 IFN $\alpha$  producing capacity. (B-C) Plasma IFN $\alpha$ 2 levels were measured by SIMOA. Spearman  
 105 correlations were performed between the plasma IFN $\alpha$ 2 levels at the ATI visit and the MFI of  
 106 pNF- $\kappa$ B in pDCs from the ATI visit (B) or the pre-ATI visit (C). (F) Gene expression was  
 107 measured by BioMark in mDCs sorted from the pre-ATI and ATI visits. Shown is the difference  
 108 in CT values between the ATI time point and pre-ATI time point after normalization to GAPDH  
 109 (mean  $\pm$  SEM, \*  $p < 0.05$ , \*\*  $p < 0.01$ , One sample Wilcoxon test, blue indicates values were no  
 110 longer significant when corrected for a false discovery rate of 10% by the Benjamin-Hochberg  
 111 Procedure). (G) Spearman correlation between the plasma IFN $\alpha$ 2 levels after viral rebound and  
 112 the change in *IFNA2* levels in mDCs at the ATI time point. (A-E)  $n = 8$  participants from RV397,  
 113 all received VRC01 (F-G)  $n = 8$  participants from RV397, 4 of whom received VRC01.  
 114

115 **Supplemental Table 1. TaqMan Assay IDs**  
 116

| <b>Gene</b> | <b>TaqMan Assay ID</b> | <b>Gene</b> | <b>TaqMan Assay ID</b> |
|-------------|------------------------|-------------|------------------------|
| CASP3       | Hs00234387_m1          | IFNA7       | Hs01652729_s1          |
| CCL3        | Hs00234142_m1          | IFNA8       | Hs00932530_s1          |
| CCL4        | Hs99999148_m1          | IFNAR1      | Hs01066116_m1          |
| CCR7        | Hs01013469_m1          | IFNB1       | Hs01077958_s1          |
| CXCR4       | Hs00237052_m1          | IRF1        | Hs00971965_m1          |
| CXCR5       | Hs00540548_s1          | IRF7        | Hs01014809_g1          |
| GAPDH       | Hs99999905_m1          | MX1         | Hs00895608_m1          |
| IFNA1       | Hs00855471_g1          | MX2         | Hs01550814_m1          |
| IFNA14      | Hs00533748_s1          | STAT1       | Hs01013996_m1          |
| IFNA17      | Hs00819693_sH          | STAT2       | Hs01013123_m1          |
| IFNA2       | Hs02621172_s1          | TLR7        | Hs00152971_m1          |
| IFNA21/1    | Hs00353738_s1          | TNFA        | Hs00174128_m1          |
| IFNA5       | Hs00818220_s1          |             |                        |

117

118

119
